# Supplementary material for: The structure of a polyketide synthase bimodule core
Source: PubMed Central journal article supplement — Sci Adv. 2022 Sep 21;8(38):eabo6918. doi: 10.1126/sciadv.abo6918 (PMC9491710; doi:10.1126/sciadv.abo6918), 2022-09-21
Supplement: sciadv.abo6918_sm.pdf [file sciadv.abo6918_sm.pdf]

Supplementary Materials for  
**The structure of a polyketide synthase bimodule core**

Yves U. Tittes *et al.*

Corresponding author: Timm Maier, [timm.maier@unibas.ch](mailto:timm.maier@unibas.ch)

*Sci. Adv.* **8**, eabo6918 (2022)  
DOI: 10.1126/sciadv.abo6918

**The PDF file includes:**

Figs. S1 to S9  
Tables S1 and S2  
Legend for movie S1  
Legend for data S1  
References

**Other Supplementary Material for this manuscript includes the following:**

Movie S1  
Data S1

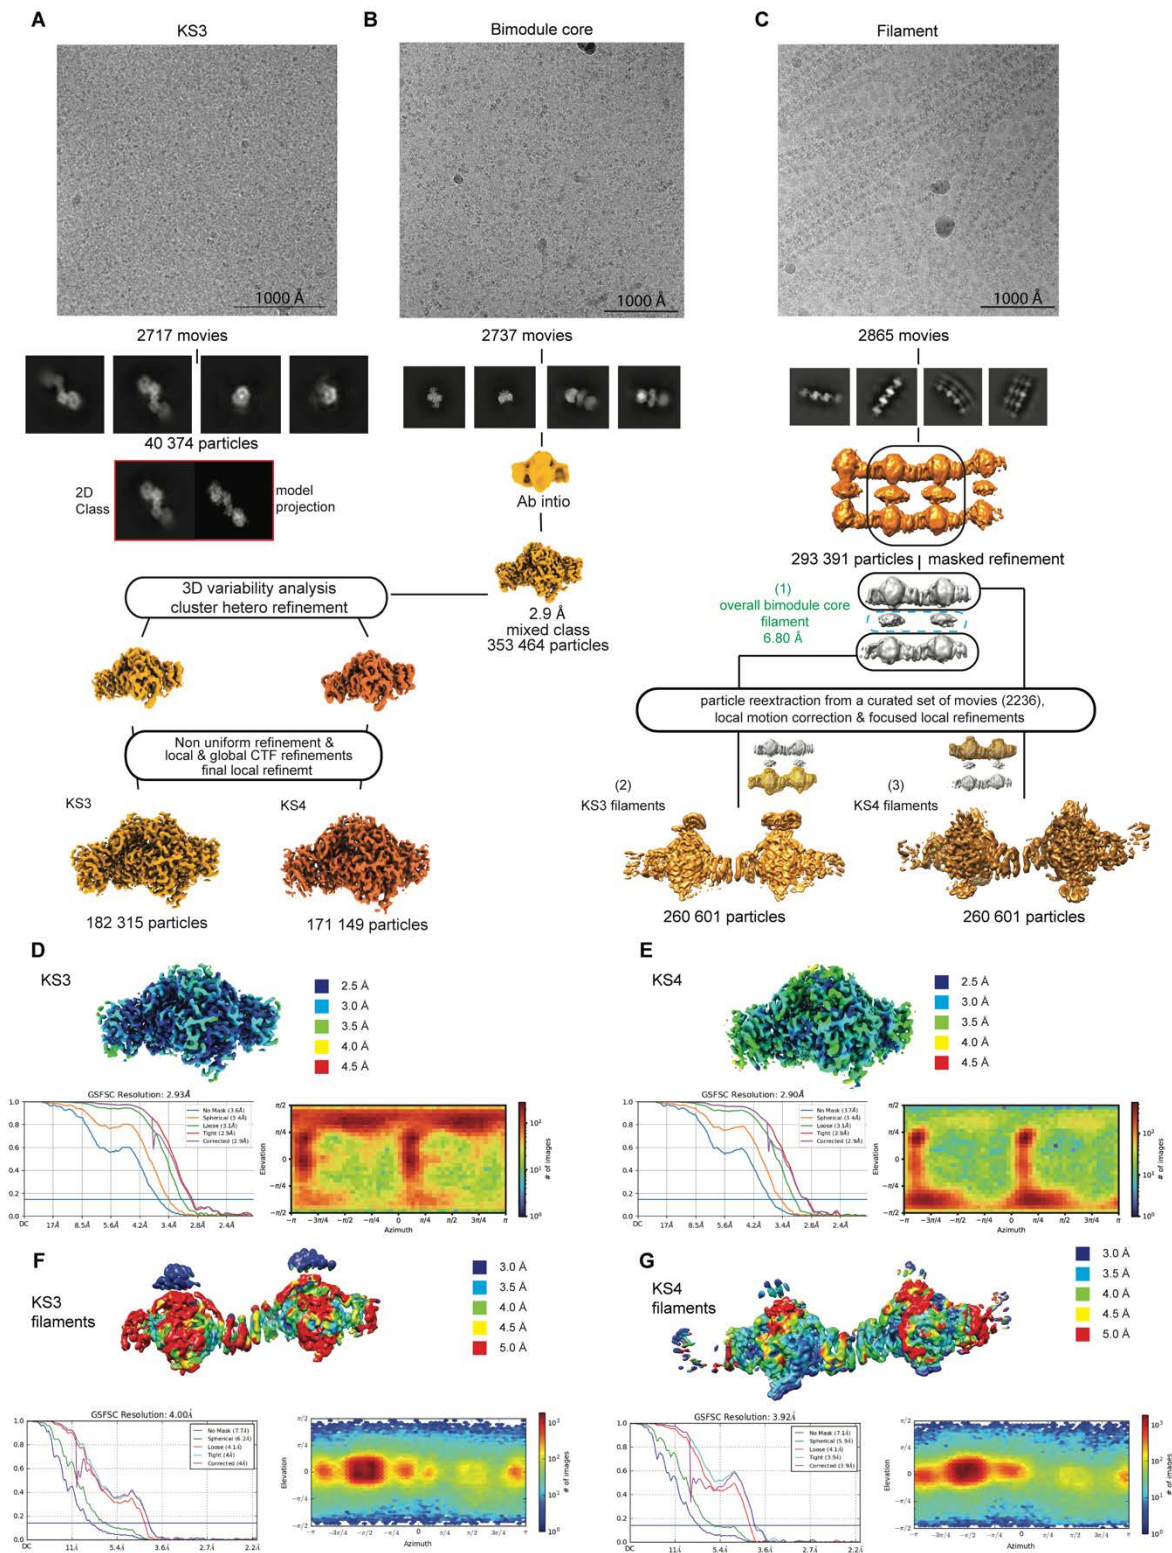

**Fig. S1.**

**Schematic representation of cryoEM data processing.** A total of three datasets were collected, one of the recombinantly expressed isolated KS3 (A), one of individual bimodule core dimers (B) and one of bimodule core filaments (C). **(A)** Data set for individual KS3

domains. 2D class averages reveal dimerization via the LINKS interface of the LD instead of the canonical KS dimer interface, as shown by comparison of a 2D class to a projection based on a model of LINKS-bridged KS3 monomers. Particle number, size and variability precluded high-resolution 3D reconstruction. **(B)** Data set for individual K3DAK4 bimodule cores. The overall bimodule core is highly flexible, but 3D variability analysis-based sorting into particle sets representing either KS3 (EMDB-14795) or KS4 (EMDB-14793) provided individual reconstructions for each KS to 2.9 Å resolution. Validation of sorting based on map analysis is provided in Figure S3. **(C)** Analysis of the K3DAK4 filament data set. To prevent misalignment due to pseudosymmetry a box-size large enough to fit four adjacent bimodule cores was chosen in the initial particle picking and reconstruction steps. The intermediate resolution overall bimodule core filament map (EMDB-14945) (1) was used for the rigid body refinement of the overall model. Focused refinements on pairs of KS dimers connected via LINKS interaction lead to improved local maps for pairs of KS3 (2) and KS4 (3) dimers at resolutions of 4.0 Å and 3.9 Å, respectively. Masks used in local refinement of pairs of KS3 or KS4 dimers are shown and the region excised from the overall map (1) for representing DH3 domains in the hybrid model in Fig. 2 is schematically indicated by a blue dashed line. **(D-G)** Local resolution maps, FSC plots and viewing direction distribution plots for individual reconstructions as indicated.

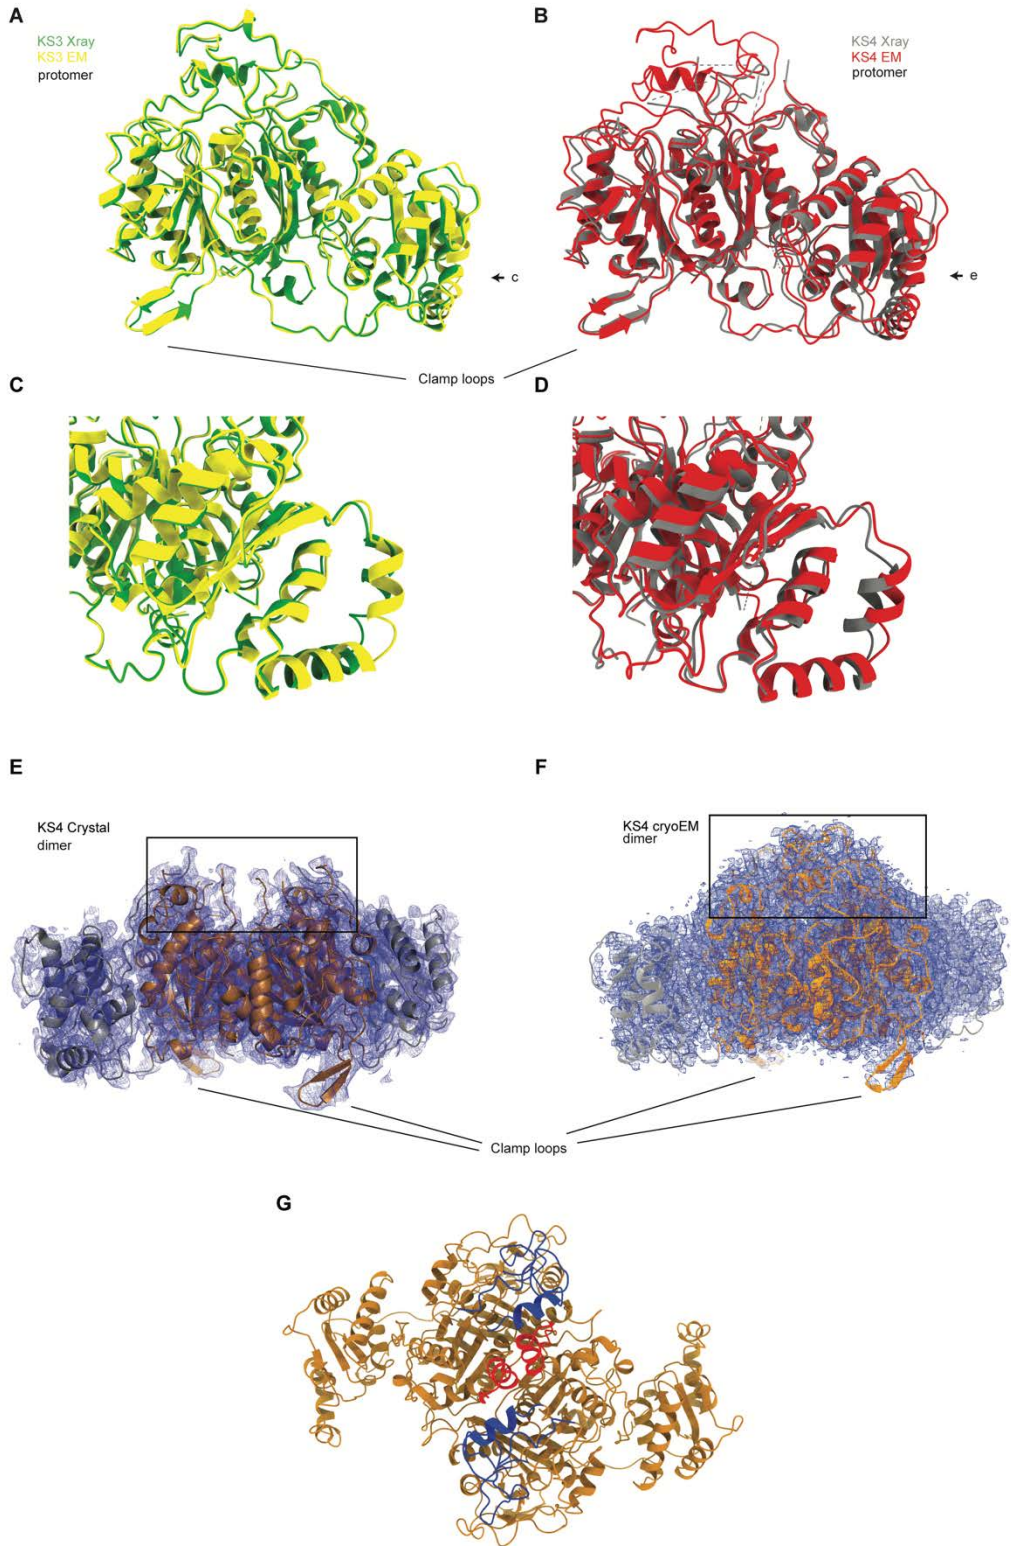

**Fig. S2.**

**Analysis of KS3 and KS4 domain structures. (A-F)** Comparison of models of KSs derived from X-ray crystallographic analysis of the isolated domains and cryoEM analysis of KS domains in the context of individual bimodule cores for KS3 (A,C; yellow: cryoEM, green: crystallographic) and KS4 (B,D; red: cryoEM, grey: crystallographic) **(E,F,G)**, A central region around the active site (indicated by rectangles in (E,F) and red or blue color in (G)) is disordered in crystallographic analysis and not visualized in the crystallographic map at a contour level of 1.7 sigma (E), but is visualized in the cryoEM-derived map at contour level 0.26 in arbitrary units (F). (G) Cartoon style overview representation of KS4 based on cryoEM analysis. Regions shown in blue and red are only visualized in the cryoEM map (F), but not in the crystallographic map (E). The helix colored in red is a 20 AA extension of KS4 relative to KS3.

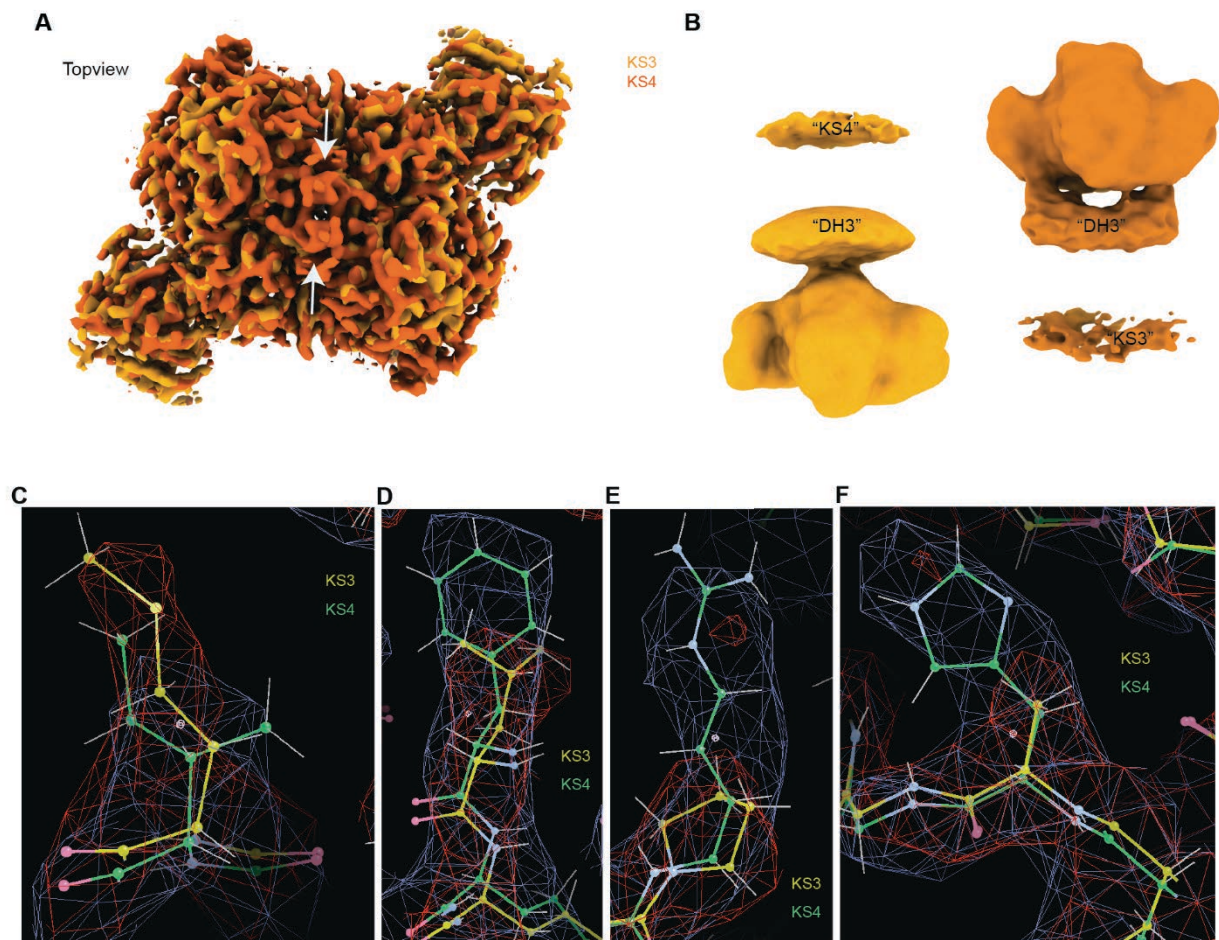

**Fig. S3.**

**Comparison of KS3 and KS4 cryoEM maps and models. (A)** Overlay of the individual maps for the closely-related KS3 and KS4 domains shows an overall highly similar structure. Differences are apparent around the center region close to the C-terminus above the active sites, where a loop (indicated by an arrow) in KS4 is around 20 AA longer than in KS3. In **(B)** B-factor softened ( $600 \text{ \AA}^2$ ) maps for KS3 and KS4 reconstructions reveal residual low-resolution densities presumably representing the additional domains of the bimodule core in agreement with their relative positioning to each KS. **(C-F)** Individual examples of differences in sequence between KS3 and KS4 reflected in the respective cryoEM maps, confirming successful sorting into particles representing either KS3 or KS4. Model and map for KS3 in yellow and red; for KS4 in green and blue respectively.

**A**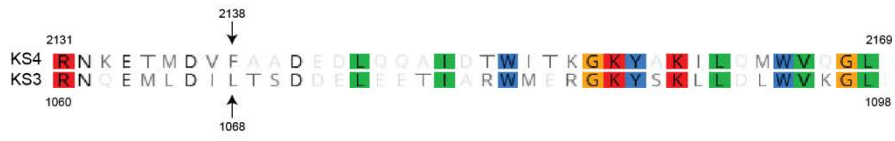**B**

KS3 LINKS

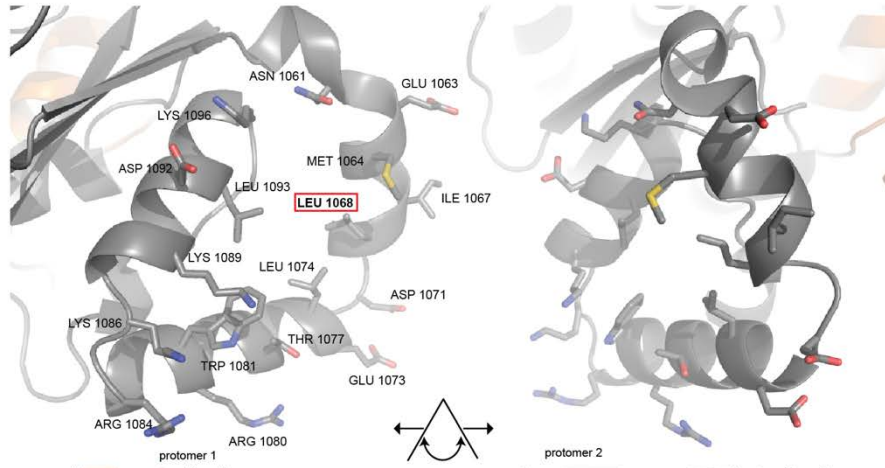**C**

KS4 LINKS

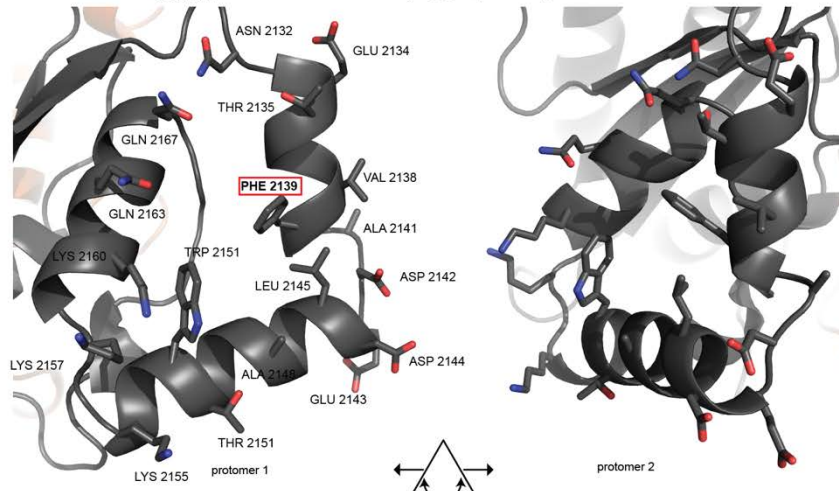**D**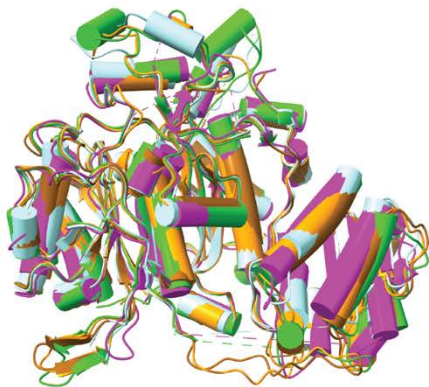**E**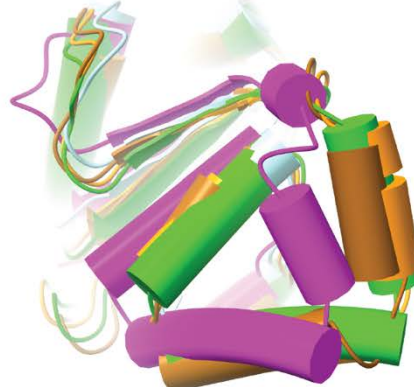

**Fig. S4.**

**Structural analysis of KS3 and KS4 LINKS interfaces. (A)** Sequence alignment of the three-alpha helical LINKS motifs in KS3 and KS4. **(B,C)** LINKS interfaces of KS3 (B) and KS4 (C) as observed in crystal structures. For visualization, the interfaces are opened up by rotation and translation. The overall three-alpha helical fold is similar for KS3 and KS4, but variations of individual residues such as LEU1068 in KS3 matching PHE2139 in KS4 (indicated also in (A)) ensure that steric clashes prevent mispairing between the KS domains of module 3 and 4. **(D,E)** Structural superimposition of the KS domains KS3 (light orange) and KS4 (dark orange) (reported here), isolated KS2 from the same BGC11 (green, PDB 4Z37), KS9 of the bacillaene cluster in *Bacillus amyloliquifaciens* (cyan, PDB 6MHK) and KS6 of the bacillaene cluster from *Bacillus subtilis* (purple, PDB 5ERF), the overall RMSDs ( $C\alpha$ ) are below 1.1 Å. (D) Side view and (E) view onto the LINKS interface of superimposed KS domains.



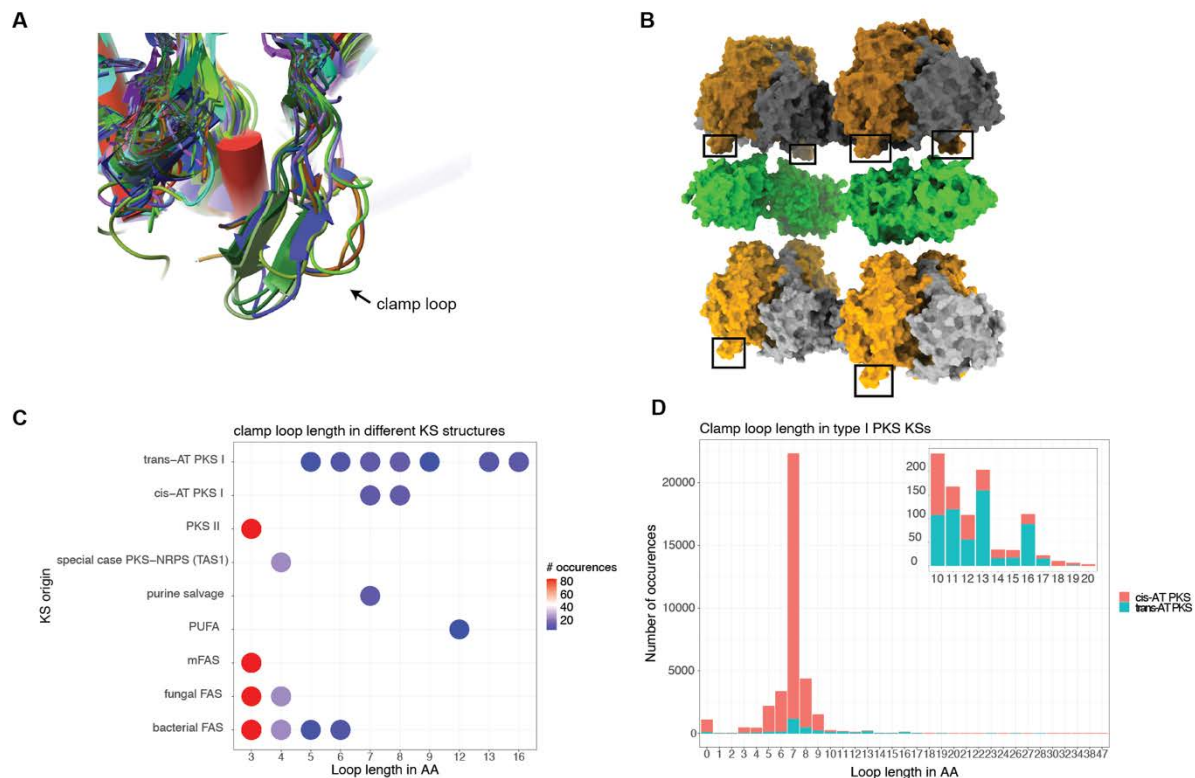

**Fig. S5.**

**Analysis of clamp loops in KS domains. (A)** Zoom-in view onto the clamp loop region of structurally characterized KSs (listed in Data S1) superimposed on KS3. The clamp loop is positioned between residues 920 and 936 in KS3, locating it just before the core  $\beta$ -strand 13. **(B)** Localization of the KS clamp loops in the assembled K3DAK4 filament (two clamp loops for KS3 are obscured from vision by other parts of the molecule). **(C)** Visualization of clamp loop lengths for different classes of KS domains derived from the structural comparison shown in (A); only KS domains of *trans*-AT PKSs exhibit long clamp loops (13/16 residues), but short clamp loops also occur in *trans*-AT PKS. In type II PKS, mammalian and fungal fatty acid synthases, the clamp loop is completely absent. Most *cis*-AT PKS KSs feature a shorter clamp loop, similar to that of short clamp loops in *trans*-AT PKS KSs. **(D)** Analysis of clamp loops across a set of ~36'500 type I PKS KS sequences aligned using ClustalOmega (49). There is a distinct preference towards loops of 7 AAs length in both *cis*- and *trans*-AT KSs. Longer loops are less common in both systems; however, they are much more common in *trans*-AT PKSs than in *cis*-AT PKSs. Sequences and their classification as *cis*- or *trans*-AT are derived from "Antismash" (48) and have not been checked individually for misclassifications. The insert shows a zoom of the 10-20 AA loop-length region.

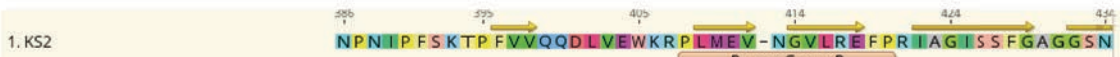

|               |                                                                 |
|---------------|-----------------------------------------------------------------|
| 1. KS2        | NPNIIPFSKTPFVYVQDLVEWKRPLMEV-NGVLRERFPRRIAGLSSFGAGGSN           |
| 2. KS3        | NPNIIDFTKTPFVYVQDLVEWKRPLMEV-NGVLRERFPRRIAGLSSFGAGGSN           |
| 3. KS4        | NPNIIDFSKTPFVYVQDLVEWKRPLMEV-DGVTRERFPRRIAGLSSFGAGGSN           |
| 4. Lnml-KS1   | SPLVLDWDGLPVELVDTTPRALTPRAAD                                    |
| 5. RhiB-KS1   | SPMCLDDNH LA IADQIS - - - - - DW - - - - - GRATVLVNAV GATGSSY   |
| 6. PksK-KS1   | NPNTDLASSPFYVVDQKKTLSREIK                                       |
| 7. PksN-KS1   | NPDIKFESSPFYVVRERKSLEKHAG                                       |
| 8. OzmN-KS1   | NPDIIDFAATPFYVNTETRPWA GEG                                      |
| 9. OzmQ-KS    | NPDIIDFAAGPFYVGTETKEWPAGPT                                      |
| 10. DfnH-KS2  | FEHYDFEASR IHFNREPVDWHSEKK                                      |
| 11. OzmH-KS4  | LEHFDFAATPLRFERALTTPWPD A - - - - - PRRAAGLSSFGAGGSN            |
| 12. DfnE-KS2  | MTHYDLSASPFYFSHA LR EWTD S - - - - - VHRRAALSSFGAGGSN           |
| 13. PksK-KS2  | MAHFDQQKANITFSRALLEKWTDS - - - - - PLRRAAGLSSFGAGGSN            |
| 14. PksL-KS4  | MPYFDIEKTDLYFSRSQA EWKE T - - - - - PRRAAGLSSFGAGGSN            |
| 15. BryC-KS4  | NPNIHRENLPFE LQTELD EWRQLTI - - - - - ADKKI PRRAAGLSSFGAGGSN    |
| 16. OzmJ-KS2  | NPNIIDLRILPFE LSGAPAWDQVTV - - - - - DGALV PRRAAGLSSFGAGGSN     |
| 17. MmpA-KS1  | NLHLHTAGQPCRELATHTDWRPQAT - - - - - PRRAAGLSSFGAGGSN            |
| 18. PksR-KS1  | NPNIKLEHTAFYLRQETEPWHR LNDP - - - - - ETGKQL PRRAAGLSSFGAGGSN   |
| 19. RhiD-KS3  | NPNIHRL EGSAYFLQQQVAPWPA P VSA - - - - - EGARE PRRAAGLSSFGAGGSN |
| 20. RhiE-KS3  | NQDIIDFADTPFVYVQDLVEWKRPLMEV-NGVLRERFPRRIAGLSSFGAGGSN           |
| 21. PksR-KS2  | NDQVSLKGTFRMTAENQWRDLSD - - - - - AGKKI PRRAAGLSSFGAGGSN        |
| 22. RhiA-KS1  | NPNIIDLRQRLRLQADSRPWPAPKDA - - - - - NGLAL PRRAAGLSSFGAGGSN     |
| 23. PksM-KS3  | NPYIPFKESSPFMLCKENRSWIKKNQ - - - - - KPRMGTSTTGISGNT            |
| 24. DfnG-KS2  | NPYINWEKSPFYVNTKTKGKWPSP L PG - - - - - KNRMGAVSAFGAGGSN        |
| 25. RhiE-KS2  | NDYIHQQSSPFYVNTKTKGKWPSP L PG - - - - - DSERLGA VSAFGAGGSN      |
| 26. BryB-KS4  | NDYIQWSSPFYVNTKTKGKWPSP L PG - - - - - KPRLGA VSAFGAGGSN        |
| 27. BryA-KS2  | NDYIHWSSPFYVNTKTKGKWPSP L PG - - - - - KARMGALSAFGAGGSN         |
| 28. BryD-KS1  | NDYIHWSSPFYVNTKTKGKWPSP L PG - - - - - KARMGALSAFGAGGSN         |
| 29. OzmK-KS   | NKHADFDES P VYV SREPADWNR EGE - - - - - EPRVAGVSAFGAGGSN        |
| 30. OzmJ-KS1  | NPNIIDLRGSAFVADATAGPWRHPAG - - - - - VPLMAAVNSFGAGGSN           |
| 31. RhiC-KS2  | NPNIIDLELGS PFYINHQAI DWQPTGG - - - - - KRLLSALMAFGAGGSN        |
| 32. RhiD-KS1  | NPRIALADSAFTIHRE LKDW P VGD S - - - - - GIRMALNSFGAGGSN         |
| 33. PksL-KS3  | NEHFEFEHSPLYMNTLKPWETADG - - - - - KPRRACVSAFGAGGSN             |
| 34. BryX-KS3  | NSHHPIDKTPFVYVNTKTKGKWPSP L PG - - - - - QSRCAAVSAFGAGGSN       |
| 35. Lnml-KS2  | NPKTELDSSPFYVNRDRQEWEPGPG - - - - - GORLIATVSAFGAGGSN           |
| 36. BryB-KS1  | NPQIALEGS PFYINTE LKWPQSGDS - - - - - IPRRAGVSAFGAGGSN          |
| 37. BryC-KS1  | NPQIALEGS PFYINTE LKWPQSGDS - - - - - IPRRAGVSAFGAGGSN          |
| 38. MmpD-KS4  | NAAIAVQGS PFYMPDQRLPWTALDG - - - - - VPRRASVSAFGAGGSN           |
| 39. MmpD-KS2  | NPDIIDFADSPFFLNQ L GDWPA IDG - - - - - APRRAALSSFGAGGSN         |
| 40. DfnJ-KS   | NQHILQFADSPFFVNEK I I PERNPD - - - - - APRRAALSSFGAGGSN         |
| 41. BryB-KS2  | NPNIIDFDRSPFYVNTLURDWSVGE - - - - - ETRCATVSAFGAGGSN            |
| 42. BryC-KS3  | NPNIIDFDRSPFYVNTLURDWSVGE - - - - - ETRCATVSAFGAGGSN            |
| 43. DfnG-KS4  | NPRIQFNDS PLYPVLURKWDGKKE - - - - - ILRAGVSAFGAGGSN             |
| 44. Lnml-KS3  | NPRIQFNDS PLYPVLURKWDGKKE - - - - - RLVVAGVSAFGAGGSN            |
| 45. MlnE-KS2  | NPRIQFNDS PLYPVLURKWDGKKE - - - - - VLRAGVSAFGAGGSN             |
| 46. MlnG-KS2  | NPRIQFNDS PLYPVLURKWDGKKE - - - - - KR RAGVSAFGAGGSN            |
| 47. RhiE-KS1  | NPRIQFNDS PLYPVLURKWDGKKE - - - - - PRRAGVSAFGAGGSN             |
| 48. MlnB-KS1  | NPRIQFNDS PLYPVLURKWDGKKE - - - - - APRRAGVSAFGAGGSN            |
| 49. RhiF-KS1  | NPRIQFNDS PLYPVLURKWDGKKE - - - - - PRRAGVSAFGAGGSN             |
| 50. MmpD-KS1  | SSRIDLQGS PFYVNTKTKGKWPSP L PG - - - - - VRRAGVSAFGAGGSN        |
| 51. BryX-KS1  | NPYIQLSGTFFH LVNKTMKWATLKDR - - - - - RGGEI PRRAGVSAFGAGGSN     |
| 52. MlnD-KS2  | NPYIQLSGTFFH LVNKTMKWATLKDR - - - - - KGNEI PRRAGVSAFGAGGSN     |
| 53. Lnml-KS4  | SPYLRLDGTPFTVDRHRPWEPA L TP - - - - - DGRQV L RAGVSAFGAGGSN     |
| 54. DfnD-KS3  | NSYIQLSGTFFH LVNKTMKWATLKDR - - - - - SGNEI PRRAGVSAFGAGGSN     |
| 55. BryC-KS2  | NPYIQLSGTFFH LVNKTMKWATLKDR - - - - - YQNP L RAGVSAFGAGGSN      |
| 56. MlnB-KS3  | NPYIQLSGTFFH LVNKTMKWATLKDR - - - - - ENNDL PRRAGVSAFGAGGSN     |
| 57. OzmH-KS2  | NPYIQLSGTFFH LVNKTMKWATLKDR - - - - - DGTA L PRRAGVSAFGAGGSN    |
| 58. RhiD-KS2  | NPYIQLSGTFFH LVNKTMKWATLKDR - - - - - NGHAL PRRAGVSAFGAGGSN     |
| 59. PksK-KS2  | NPYIQLSGTFFH LVNKTMKWATLKDR - - - - - DGNL PRRAGVSAFGAGGSN      |
| 60. DfnG-KS3  | NPYIQLSGTFFH LVNKTMKWATLKDR - - - - - NGRVL PRRAGVSAFGAGGSN     |
| 61. PksN-KS2  | NPYIQLSGTFFH LVNKTMKWATLKDR - - - - - QGEEL PRRAGVSAFGAGGSN     |
| 62. PksN-KS3  | NPYIQLSGTFFH LVNKTMKWATLKDR - - - - - AGRLEL PRRAGVSAFGAGGSN    |
| 63. MmpA-KS2  | NPDIIDASLSPFRVQAL E PWVDVG - - - - - EGAQE PRRAGVSAFGAGGSN      |
| 64. MlnB-KS2  | HPDLYLEETPFVYVQDLVEWKRPLMEV-NGVLRERFPRRIAGLSSFGAGGSN            |
| 65. RhiC-KS3  | NPNIIDLRDTPFVYVQDLVEWKRPLMEV-NGVLRERFPRRIAGLSSFGAGGSN           |
| 66. DfnE-KS1  | NPNIIDLRDTPFVYVQDLVEWKRPLMEV-NGVLRERFPRRIAGLSSFGAGGSN           |
| 67. BryD-KS2  | NSNIIDFEDTAFRLQKEVEWKRPLMEV-NGVLRERFPRRIAGLSSFGAGGSN            |
| 68. BryA-KS3  | NPNIIDFEDTAFRLQKEVEWKRPLMEV-NGVLRERFPRRIAGLSSFGAGGSN            |
| 69. RhiF-KS2  | NPNIIDFEDTAFRLQKEVEWKRPLMEV-NGVLRERFPRRIAGLSSFGAGGSN            |
| 70. OzmH-KS5  | NPNIIDFEDTAFRLQKEVEWKRPLMEV-NGVLRERFPRRIAGLSSFGAGGSN            |
| 71. DfnF-KS   | NPNIIDFEDTAFRLQKEVEWKRPLMEV-NGVLRERFPRRIAGLSSFGAGGSN            |
| 72. PksL-KS1  | NPNIIDFEDTAFRLQKEVEWKRPLMEV-NGVLRERFPRRIAGLSSFGAGGSN            |
| 73. PksM-KS1  | NPNIIDFEDTAFRLQKEVEWKRPLMEV-NGVLRERFPRRIAGLSSFGAGGSN            |
| 74. DfnD-KS1  | NPNIIDFEDTAFRLQKEVEWKRPLMEV-NGVLRERFPRRIAGLSSFGAGGSN            |
| 75. DfnH-KS1  | NPNIIDFEDTAFRLQKEVEWKRPLMEV-NGVLRERFPRRIAGLSSFGAGGSN            |
| 76. RhiB-KS2  | NPNIIDFEDTAFRLQKEVEWKRPLMEV-NGVLRERFPRRIAGLSSFGAGGSN            |
| 77. Lnml-KS1  | NPNIIDFEDTAFRLQKEVEWKRPLMEV-NGVLRERFPRRIAGLSSFGAGGSN            |
| 78. OzmN-KS3  | NPNIIDFEDTAFRLQKEVEWKRPLMEV-NGVLRERFPRRIAGLSSFGAGGSN            |
| 79. MlnF-KS   | NPNIIDFEDTAFRLQKEVEWKRPLMEV-NGVLRERFPRRIAGLSSFGAGGSN            |
| 80. MlnD-KS1  | NPNIIDFEDTAFRLQKEVEWKRPLMEV-NGVLRERFPRRIAGLSSFGAGGSN            |
| 81. MlnC-KS   | NPNIIDFEDTAFRLQKEVEWKRPLMEV-NGVLRERFPRRIAGLSSFGAGGSN            |
| 82. MlnE-KS1  | NPNIIDFEDTAFRLQKEVEWKRPLMEV-NGVLRERFPRRIAGLSSFGAGGSN            |
| 83. RhiB-KS4  | NPNIIDFEDTAFRLQKEVEWKRPLMEV-NGVLRERFPRRIAGLSSFGAGGSN            |
| 84. BryB-KS3  | NPNIIDFEDTAFRLQKEVEWKRPLMEV-NGVLRERFPRRIAGLSSFGAGGSN            |
| 85. BryX-KS2  | NPNIIDFEDTAFRLQKEVEWKRPLMEV-NGVLRERFPRRIAGLSSFGAGGSN            |
| 86. OzmH-KS3  | NPNIIDFEDTAFRLQKEVEWKRPLMEV-NGVLRERFPRRIAGLSSFGAGGSN            |
| 87. Lnml-KS2  | NPNIIDFEDTAFRLQKEVEWKRPLMEV-NGVLRERFPRRIAGLSSFGAGGSN            |
| 88. DfnI-KS   | NPNIIDFEDTAFRLQKEVEWKRPLMEV-NGVLRERFPRRIAGLSSFGAGGSN            |
| 89. MlnG-KS1  | NPNIIDFEDTAFRLQKEVEWKRPLMEV-NGVLRERFPRRIAGLSSFGAGGSN            |
| 90. MmpD-KS3  | NPNIIDFEDTAFRLQKEVEWKRPLMEV-NGVLRERFPRRIAGLSSFGAGGSN            |
| 91. OzmN-KS2  | NPNIIDFEDTAFRLQKEVEWKRPLMEV-NGVLRERFPRRIAGLSSFGAGGSN            |
| 92. MmpB-KS   | NPNIIDFEDTAFRLQKEVEWKRPLMEV-NGVLRERFPRRIAGLSSFGAGGSN            |
| 93. MmpA-KS3  | NPNIIDFEDTAFRLQKEVEWKRPLMEV-NGVLRERFPRRIAGLSSFGAGGSN            |
| 94. PksL-KS2  | NPNIIDFEDTAFRLQKEVEWKRPLMEV-NGVLRERFPRRIAGLSSFGAGGSN            |
| 95. BryA-KS1  | NPNIIDFEDTAFRLQKEVEWKRPLMEV-NGVLRERFPRRIAGLSSFGAGGSN            |
| 96. Lnml-KS3  | NPNIIDFEDTAFRLQKEVEWKRPLMEV-NGVLRERFPRRIAGLSSFGAGGSN            |
| 97. OzmH-KS1  | NPNIIDFEDTAFRLQKEVEWKRPLMEV-NGVLRERFPRRIAGLSSFGAGGSN            |
| 98. RhiC-KS1  | NPNIIDFEDTAFRLQKEVEWKRPLMEV-NGVLRERFPRRIAGLSSFGAGGSN            |
| 99. RhiB-KS3  | NPNIIDFEDTAFRLQKEVEWKRPLMEV-NGVLRERFPRRIAGLSSFGAGGSN            |
| 100. DfnD-KS2 | NPNIIDFEDTAFRLQKEVEWKRPLMEV-NGVLRERFPRRIAGLSSFGAGGSN            |
| 101. DfnG-KS1 | NPNIIDFEDTAFRLQKEVEWKRPLMEV-NGVLRERFPRRIAGLSSFGAGGSN            |
| 102. PksM-KS2 | NPNIIDFEDTAFRLQKEVEWKRPLMEV-NGVLRERFPRRIAGLSSFGAGGSN            |

**Fig. S6.**

**Sequence comparison of the clamp loop region across a subset of KS domains.** KS domains with long clamp loops (13-16AA) from *trans*-AT PKSs show a recurring PxxxxGxxxxP motif, presumably linked to  $\beta$ -hairpin formation.

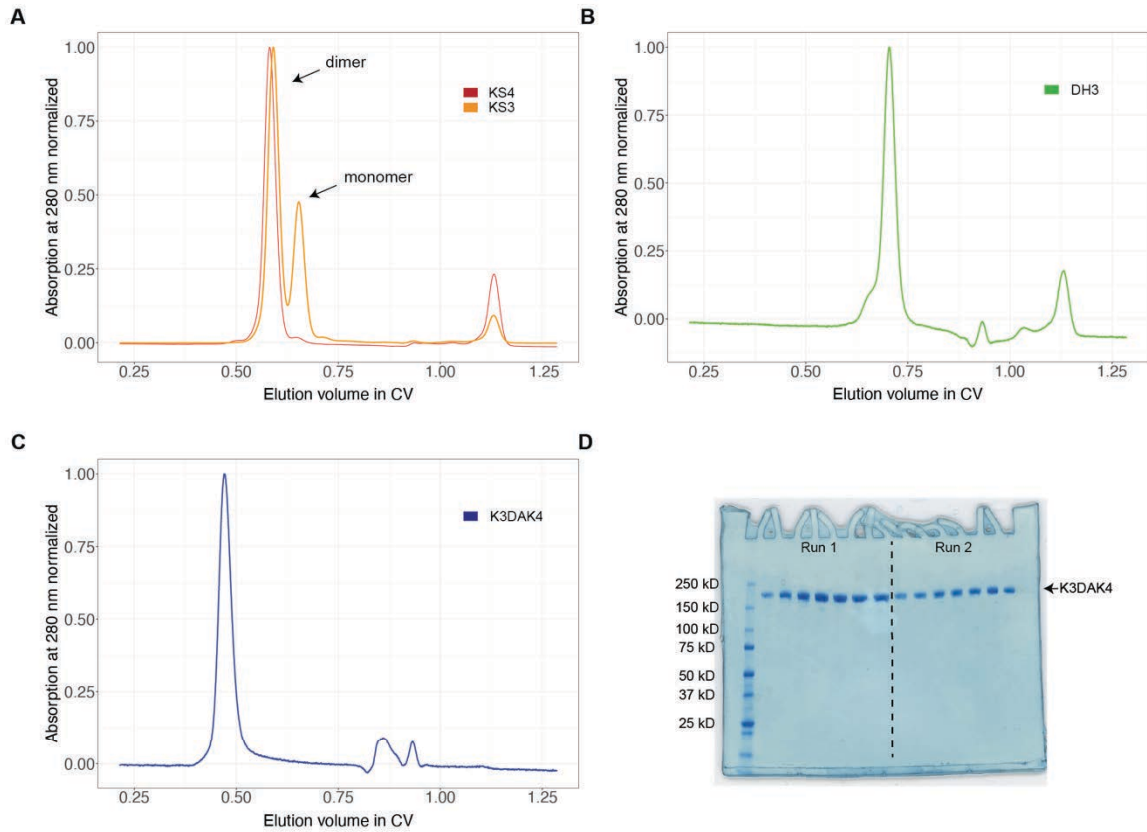

**Fig. S7.**

**Size-exclusion chromatography of KS3, KS4, DH and the intact K3DAK4 bimodule core.** Chromatography was performed on an Superdex 200 increase column at 23°C. **(A)** Overlay of KS3 and KS4 elution. KS4 elutes as a stable dimer, whereas KS3 elutes in a monomer-dimer equilibrium. **(B)** Monodisperse elution of DH3. **(C)** The K3DAK4 bimodule elutes as a monodisperse dimer. **(D)** Uncropped SDS-PAGE analysis of two individual size-exclusion chromatography runs on an Superdex 200 column of a K3DAK4 purification.

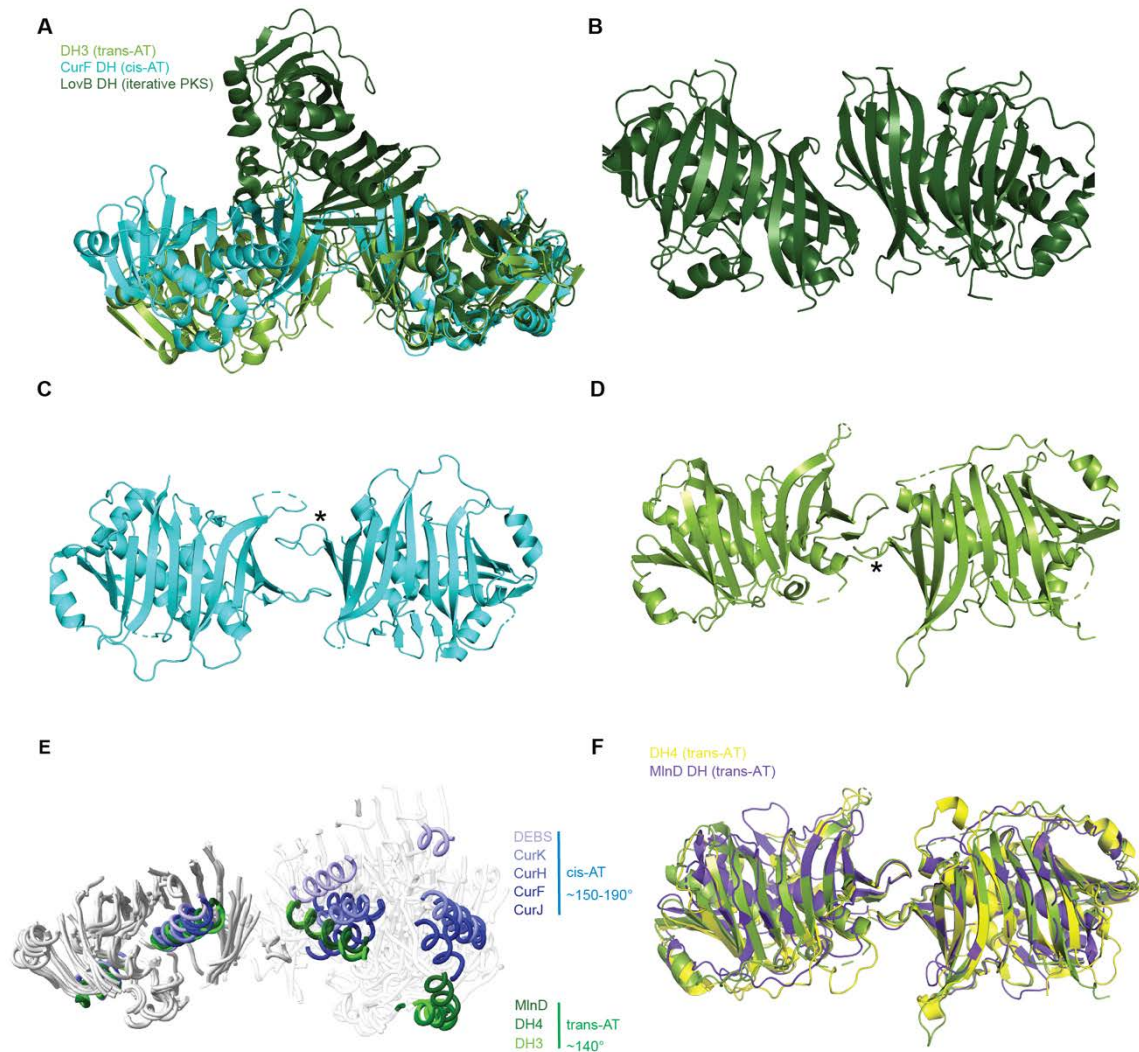

**Fig. S8.**

**DH dimerization interfaces in different types of PKS.** The *trans*-AT PKS DH3 from BGC11 (reported here) is shown in green, the DH from the *cis*-AT PKS CurF (PDB 3KG6) in cyan and the DH of the iterative PKS LovB (PDB 7CPX) in dark green. **(A)** Comparison of all three DH dimers based on superposition of the right protomer. The two *cis*- and *trans*-AT PKS DH dimers exhibit similar interdomain angles, clearly distinct from that of the iterative PKS LovB. **(B-D)** Depiction of the individual dimerization interfaces. While *cis*- and *trans*-AT PKS rely on the N-terminal loop to dimerize, the iterative LovB PKS dimerizes via interactions of the beta-strands of the double-hotdog fold. Asterisks in (C) and (D) depict the N-terminal loop of the aligned protomer in DH3 and CurF DH. *cis*-AT DHs dimerize via their N-terminal loops docking to reach  $\beta$ 1-2 and  $\beta$ 5-6 from one side, whereas the loops of *trans*-AT PKS DHs approach from the other side. **(E)** Shape comparison of DH dimer from *cis*- and *trans*-AT PKS. DH dimers are superimposed based on the left protomer. Superpositioning, visualization and calculation of interdomain angles is based only on ordered secondary structure elements. Two conserved helices in each protomer are shown in color to highlight differences in protomer orientation, these helices are colored in shades of blue for *cis*-AT PKS and in shades of green for *trans*-AT PKS DH domains as indicated. **(F)** Comparison of the dimerization mode of three *trans*-AT PKS DH domains, DH3 (green),

DH4 (yellow, PDB 5HQW) of BGC11 studied here, and MInD (purple, PDB 5IL5). DH dimers are superimposed based on the left protomer only. The mode dimerization is highly similar for all three DH domains.

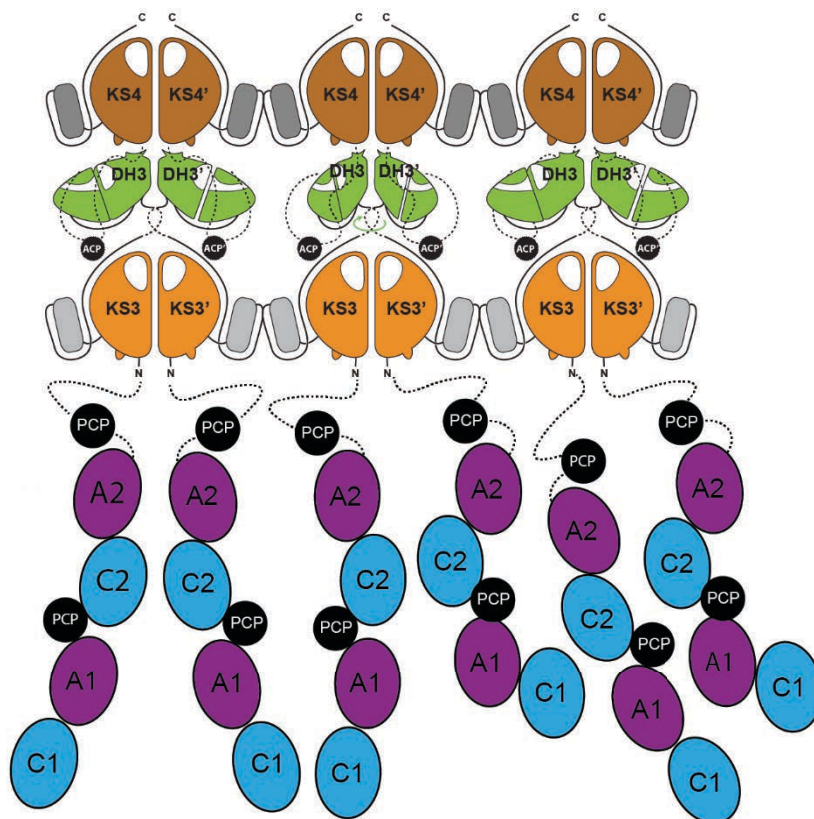

**Fig. S9.**

**Schematic model of a hybrid NRPS-PKS assembly line.** C represents the NRPS condensation domain, whereas A refers to the adenylation domain of NRPS and PCP to the peptidyl carrier protein of NRPS. While large conformational rearrangements are common in NRPS and necessary for catalytic activity, the PKS meshwork restrains conformational space.

**Table S1.****X-ray crystallographic data collection and refinement statistics**

|                                                      | KS3<br>PDB 7ZM9                            | DH3<br>PDB 7ZMF                            | KS4<br>PDB 7ZMC                            |
|------------------------------------------------------|--------------------------------------------|--------------------------------------------|--------------------------------------------|
| <b>Data collection</b>                               |                                            |                                            |                                            |
| Space group                                          | C 1 2 1                                    | P 21 21 2                                  | C 2 2 21                                   |
| Cell dimensions                                      |                                            |                                            |                                            |
| <i>a</i> , <i>b</i> , <i>c</i> (Å)                   | 126.78 92.69 99.27                         | 72.38 197.36 39.17                         | 73.56 191.79 293.81                        |
| $\alpha$ , $\beta$ , $\gamma$ (°)                    | 90 92.54 90                                | 90 90 90                                   | 90 90 90                                   |
| Resolution (Å)                                       | 60.48 - 1.62<br>(1.66 - 1.62) <sup>1</sup> | 48.68 - 2.21<br>(2.26 - 2.21) <sup>1</sup> | 48.97 - 3.10<br>(3.20 - 3.10) <sup>1</sup> |
| <i>R</i> <sub>sym</sub> Or <i>R</i> <sub>merge</sub> | 4.8 (171.2)                                | 14.68 (205.2)                              | 28.3 (460.4)                               |
| <i>I</i> / $\sigma$ <i>I</i>                         | 16.65 (1.01)                               | 14.37 (1.33)                               | 8.44 (0.53)                                |
| Completeness (%)                                     | 99.70 (99.40)                              | 99.0 (98.30)                               | 99.55 (98.11)                              |
| Redundancy                                           | 6.80 (7.00)                                | 13.39 (13.69)                              | 13.61 (13.66)                              |
| CC1/2                                                | 100.0 (62.5)                               | 99.9 (66.7)                                | 99.9 (41.9)                                |
| <b>Refinement</b>                                    |                                            |                                            |                                            |
| Resolution (Å)                                       | 60.48 - 1.62<br>(1.66 - 1.62)              | 48.68 - 2.21<br>(2.29 - 2.21)              | 48.97 - 3.10<br>(3.21 - 3.10)              |
| No. reflections                                      | 145,063                                    | 28,951                                     | 38,108                                     |
| <i>R</i> <sub>work</sub> / <i>R</i> <sub>free</sub>  | 0.15/ 0.17                                 | 0.22/ 0.25                                 | 0.26/ 0.29                                 |
| No. atoms                                            |                                            |                                            |                                            |
| Protein                                              | 9,260                                      | 8,510                                      | 16,679                                     |
| Ligand/ion                                           | 110                                        | 16                                         | 0                                          |
| Water                                                | 518                                        | 78                                         | 0                                          |
| <i>B</i> -factors (Å <sup>2</sup> )                  |                                            |                                            |                                            |
| Protein                                              | 53.8                                       | 58.88                                      | 125.72                                     |
| Ligand/ion                                           | 76.28                                      | 68.17                                      | -                                          |
| Water                                                | 54.87                                      | 55.85                                      | -                                          |
| R.m.s. deviations                                    |                                            |                                            |                                            |
| Bond lengths (Å)                                     | 0.012                                      | 0.005                                      | 0.004                                      |
| Bond angles (°)                                      | 1.54                                       | 0.60                                       | 0.67                                       |
| Clashscore                                           | 2.62                                       | 2.10                                       | 5.6                                        |

<sup>1</sup> Dataset is derived from a single crystal.

\*Values in parentheses are for highest-resolution shell.



**Table S2.****Cryo-EM data collection, refinement and validation statistics**

|                                                  | KS3<br>EMDB-14795<br>PDB 7ZMD | KS4<br>EMDB-14793<br>PDB 7ZMA | K3DAK4<br>EMDB-14945<br>PDB 7ZSK |
|--------------------------------------------------|-------------------------------|-------------------------------|----------------------------------|
| <b>Data collection and processing</b>            |                               |                               |                                  |
| Magnification                                    | 130,000                       | 130,000                       | 130,000                          |
| Voltage (kV)                                     | 300                           | 300                           | 300                              |
| Electron exposure (e-/Å <sup>2</sup> )           | 67                            | 67                            | 67                               |
| Defocus range (µm)                               | 1.5-2.5                       | 1.5-2.5                       | 0.8-1.8                          |
| Pixel size (Å)                                   | 1.058                         | 1.058                         | 2.116                            |
| Symmetry imposed                                 | C2                            | C2                            | C1                               |
| Initial particle images (no.)                    | 3,332,737                     | 3,332,737                     | 1,288,160                        |
| Final particle images (no.)                      | 182,315                       | 171,149                       | 293,391                          |
| Map resolution (Å)                               | 2.93                          | 2.90                          | 6.80                             |
| FSC threshold                                    | 0.143                         | 0.143                         | 0.143                            |
| Map resolution range (Å)                         | 4.5-2.5                       | 4.5-2.5                       | 6.0-14.5                         |
| <b>Refinement type</b>                           |                               |                               |                                  |
|                                                  | Coordinate                    | Coordinate                    | Rigid-body                       |
| Initial model used (PDB code)                    | Xray KS3<br>(7ZM9)            | Xray KS4<br>(7ZMC)            | Combined                         |
| Model resolution (Å)                             | 3.10                          | 3.20                          | 10.4                             |
| FSC threshold                                    | 0.5                           | 0.5                           | 0.5                              |
| Map sharpening <i>B</i> factor (Å <sup>2</sup> ) | 90.8                          | 94.7                          | 387.4                            |
| <b>Model composition</b>                         |                               |                               |                                  |
| Non-hydrogen atoms                               | 9,294                         | 9,484                         | 46,128                           |
| Protein residues                                 | 1,191                         | 1,214                         | 5,916                            |
| Ligands                                          | 0                             | 0                             | 0                                |
| <b><i>B</i> factors (Å<sup>2</sup>)</b>          |                               |                               |                                  |
| Protein                                          | 32.28                         | 40.90                         | 735.96                           |
| Ligand                                           | -                             | -                             | -                                |
| <b>R.m.s. deviations</b>                         |                               |                               |                                  |
| Bond lengths (Å)                                 | 0.002                         | 0.003                         |                                  |
| Bond angles (°)                                  | 0.522                         | 0.894                         |                                  |
| <b>Validation</b>                                |                               |                               |                                  |
| MolProbity score                                 | 1.27                          | 1.61                          |                                  |
| Clashscore                                       | 3.75                          | 4.52                          |                                  |
| Poor rotamers (%)                                | 0.00                          | 0.00                          |                                  |
| <b>Ramachandran plot</b>                         |                               |                               |                                  |
| Favored (%)                                      | 97.47                         | 94.46                         |                                  |
| Allowed (%)                                      | 2.53                          | 5.54                          |                                  |
| Disallowed (%)                                   | 0.00                          | 0.00                          |                                  |

### **Movie S1.**

**Overview of the bimodule core filament maps and model.** Blend-over between experimental map and model-based cartoon and surface representations in different views with transition to hypothesized 2D-mesh formation, as described in the main text.

### **Data S1.**

**Analysis of clamp loop length based on experimental KS structures.** Includes pdb id, type of the BGC, organism, clamp loop length and boundary residues. Structures are shown in Fig S5 A and clamp loop length distribution is visualized in Fig S5 C. For selection of clamp loop boundaries KS3 residues 920 and 936 were used as reference.

## REFERENCES AND NOTES

1. D. J. Newman, G. M. Cragg, Natural products as sources of new drugs over the nearly four decades from 01/1981 to 09/2019. *J. Nat. Prod.* **83**, 770–803 (2020).
2. J. Piel, Metabolites from symbiotic bacteria. *Nat. Prod. Rep.* **26**, 338–362 (2009).
3. C. Hertweck, The biosynthetic logic of polyketide diversity. *Angew. Chem. Int. Ed. Engl.* **48**, 4688–4716 (2009).
4. D. C. Gay, P. J. Spear, A. T. Keatinge-Clay, A double-hotdog with a new trick: Structure and mechanism of the trans-acyltransferase polyketide synthase enoyl-isomerase. *ACS Chem. Biol.* **9**, 2374–2381 (2014).
5. T. Bretschneider, J. B. Heim, D. Heine, R. Winkler, B. Busch, B. Kusebauch, T. Stehle, G. Zocher, C. Hertweck, Vinylogous chain branching catalysed by a dedicated polyketide synthase module. *Nature* **502**, 124–128 (2013).
6. J. W. Labonte, C. A. Townsend, Active site comparisons and catalytic mechanisms of the hotdog superfamily. *Chem. Rev.* **113**, 2182–2204 (2013).
7. R. W. Broadhurst, D. Nietlispach, M. P. Wheatcroft, P. F. Leadlay, K. J. Weissman, The structure of docking domains in modular polyketide synthases. *Chem. Biol.* **10**, 723–731 (2003).
8. J. Zeng, D. T. Wagner, Z. Zhang, L. Moretto, J. D. Addison, A. T. Keatinge-Clay, Portability and structure of the four-helix bundle docking domains of trans-acyltransferase modular polyketide synthases. *ACS Chem. Biol.* **11**, 2466–2474 (2016).
9. G. J. Dodge, F. P. Maloney, J. L. Smith, Protein-protein interactions in “cis-AT” polyketide synthases. *Nat. Prod. Rep.* **35**, 1082–1096 (2018).
10. E. J. Helfrich, J. Piel, Biosynthesis of polyketides by trans-AT polyketide synthases. *Nat. Prod. Rep.* **33**, 231–316 (2016).
11. K. J. Weissman, The structural biology of biosynthetic megaenzymes. *Nat. Chem. Biol.* **11**, 660–670 (2015).

12. J. Piel, Biosynthesis of polyketides by trans-AT polyketide synthases. *Nat. Prod. Rep.* **27**, 996–1047 (2010).
13. T. Nguyen, K. Ishida, H. Jenke-Kodama, E. Dittmann, C. Gurgui, T. Hochmuth, S. Taudien, M. Platzer, C. Hertweck, J. Piel, Exploiting the mosaic structure of trans-acyltransferase polyketide synthases for natural product discovery and pathway dissection. *Nat. Biotechnol.* **26**, 225–233 (2008).
14. D. C. Gay, D. T. Wagner, J. L. Meinke, C. E. Zogzas, G. R. Gay, A. T. Keatinge-Clay, The LINKS motif zippers trans-acyltransferase polyketide synthase assembly lines into a biosynthetic megacomplex. *J. Struct. Biol.* **193**, 196–205 (2016).
15. S. Dutta, J. R. Whicher, D. A. Hansen, W. A. Hale, J. A. Chemler, G. R. Congdon, A. R. Narayan, K. Håkansson, D. H. Sherman, J. L. Smith, G. Skiniotis, Structure of a modular polyketide synthase. *Nature* **510**, 512–517 (2014).
16. D. P. Cogan, K. Zhang, X. Li, S. Li, G. D. Pintilie, S. H. Roh, C. S. Craik, W. Chiu, C. Khosla, Mapping the catalytic conformations of an assembly-line polyketide synthase module. *Science* **374**, 729–734 (2021).
17. S. R. Bagde, I. I. Mathews, J. C. Fromme, C. Y. Kim, Modular polyketide synthase contains two reaction chambers that operate asynchronously. *Science* **374**, 723–729 (2021).
18. D. A. Herbst, R. P. Jakob, F. Zahringer, T. Maier, Mycocerosic acid synthase exemplifies the architecture of reducing polyketide synthases. *Nature* **531**, 533–537 (2016).
19. J. Wang, J. Liang, L. Chen, W. Zhang, L. Kong, C. Peng, C. Su, Y. Tang, Z. Deng, Z. Wang, Structural basis for the biosynthesis of lovastatin. *Nat. Commun.* **12**, 867 (2021).
20. C. Khosla, Y. Tang, A. Y. Chen, N. A. Schnarr, D. E. Cane, Structure and mechanism of the 6-deoxyerythronolide B synthase. *Annu. Rev. Biochem.* **76**, 195–221 (2007).
21. J. Staunton, P. Caffrey, J. F. Aparicio, G. A. Roberts, S. S. Bethell, P. F. Leadlay, Evidence for a double-helical structure for modular polyketide synthases. *Nat. Struct. Biol.* **3**, 188–192 (1996).
22. A. L. Edwards, T. Matsui, T. M. Weiss, C. Khosla, Architectures of whole-module and bimodular proteins from the 6-deoxyerythronolide B synthase. *J. Mol. Biol.* **426**, 2229–2245 (2014).

23. P. D. Straight, M. A. Fischbach, C. T. Walsh, D. Z. Rudner, R. Kolter, A singular enzymatic megacomplex from *Bacillus subtilis*. *Proc. Natl. Acad. Sci. U.S.A.* **104**, 305–310 (2007).
24. M. Klaus, M. Grininger, Engineering strategies for rational polyketide synthase design. *Nat. Prod. Rep.* **35**, 1070–1081 (2018).
25. E. J. N. Helfrich, R. Ueoka, A. Dolev, M. Rust, R. A. Meoded, A. Bhushan, G. Califano, R. Costa, M. Gugger, C. Steinbeck, P. Moreno, J. Piel, Automated structure prediction of trans-acyltransferase polyketide synthase products. *Nat. Chem. Biol.* **15**, 813–821 (2019).
26. T. A. Scott, J. Piel, The hidden enzymology of bacterial natural product biosynthesis. *Nat Rev Chem* **3**, 404–425 (2019).
27. A. Nivina, K. P. Yuet, J. Hsu, C. Khosla, Evolution and diversity of assembly-line polyketide synthases. *Chem. Rev.* **119**, 12524–12547 (2019).
28. J. M. Reimer, M. Eivaskhani, I. Harb, A. Guarne, M. Weigt, T. M. Schmeing, Structures of a dimodular nonribosomal peptide synthetase reveal conformational flexibility. *Science* **366**, (2019).
29. J. M. Reimer, M. N. Aloise, P. M. Harrison, T. M. Schmeing, Synthetic cycle of the initiation module of a formylating nonribosomal peptide synthetase. *Nature* **529**, 239–242 (2016).
30. E. J. Drake, B. R. Miller, C. Shi, J. T. Tarrasch, J. A. Sundlov, C. L. Allen, G. Skinnotis, C. C. Aldrich, A. M. Gulick, Structures of two distinct conformations of holo-non-ribosomal peptide synthetases. *Nature* **529**, 235–238 (2016).
31. S. Bonhomme, A. Dessen, P. Macheboeuf, The inherent flexibility of type I non-ribosomal peptide synthetase multienzymes drives their catalytic activities. *Open Biol.* **11**, 200386 (2021).
32. J. Sambrook, D. W. Russell, Purification of nucleic acids by extraction with phenol:chloroform. *CSH Protoc.* **2006**, pdb.prot4455 (2006).
33. D. J. Fitzgerald, P. Berger, C. Schaffitzel, K. Yamada, T. J. Richmond, I. Berger, Protein complex expression by using multigene baculoviral vectors. *Nat. Methods* **3**, 1021–1032 (2006).
34. E. R. Geertsma, R. Dutzler, A versatile and efficient high-throughput cloning tool for structural biology. *Biochemistry* **50**, 3272–3278 (2011).

35. W. Kabsch, XDS. *Acta Crystallogr. D Biol. Crystallogr.* **66**, 125–132 (2010).
36. M. D. Winn, C. C. Ballard, K. D. Cowtan, E. J. Dodson, P. Emsley, P. R. Evans, R. M. Keegan, E. B. Krissinel, A. G. Leslie, A. McCoy, S. J. McNicholas, G. N. Murshudov, N. S. Pannu, E. A. Potterton, H. R. Powell, R. J. Read, A. Vagin, K. S. Wilson, Overview of the CCP4 suite and current developments. *Acta Crystallogr. D Biol. Crystallogr.* **67**, 235–242 (2011).
37. A. J. McCoy, R. W. Grosse-Kunstleve, P. D. Adams, M. D. Winn, L. C. Storoni, R. J. Read, Phaser crystallographic software. *J. Appl. Cryst.* **40**, 658–674 (2007).
38. P. Emsley, K. Cowtan, Coot: Model-building tools for molecular graphics. *Acta Crystallogr. D Biol. Crystallogr.* **60**, 2126–2132 (2004).
39. P. D. Adams, P. V. Afonine, G. Bunkoczi, V. B. Chen, I. W. Davis, N. Echols, J. J. Headd, L. W. Hung, G. J. Kapral, R. W. Grosse-Kunstleve, A. J. McCoy, N. W. Moriarty, R. Oeffner, R. J. Read, D. C. Richardson, J. S. Richardson, T. C. Terwilliger, P. H. Zwart, PHENIX: A comprehensive Python-based system for macromolecular structure solution. *Acta Crystallogr. D Biol. Crystallogr.* **66**, 213–221 (2010).
40. A. Waterhouse, M. Bertoni, S. Bienert, G. Studer, G. Tauriello, R. Gumienny, F. T. Heer, T. A. P. de Beer, C. Rempfer, L. Bordoli, R. Lepore, T. Schwede, SWISS-MODEL: Homology modelling of protein structures and complexes. *Nucleic Acids Res.* **46**, W296–W303 (2018).
41. S. H. W. Scheres, RELION: Implementation of a Bayesian approach to cryo-EM structure determination. *J. Struct. Biol.* **180**, 519–530 (2012).
42. G. M. Boratyn, C. Camacho, P. S. Cooper, G. Coulouris, A. Fong, N. Ma, T. L. Madden, W. T. Matten, S. D. McGinnis, Y. Merezhuk, Y. Raytselis, E. W. Sayers, T. Tao, J. Ye, I. Zaretskaya, BLAST: A more efficient report with usability improvements. *Nucleic Acids Res.* **41**, W29–W33 (2013).
43. D. A. Vander Wood, A. T. Keatinge-Clay, The modules of trans-acyltransferase assembly lines redefined with a central acyl carrier protein. *Proteins* **86**, 664–675 (2018).
44. L. Zhang, T. Hashimoto, B. Qin, J. Hashimoto, I. Kozono, T. Kawahara, M. Okada, T. Awakawa, T. Ito, Y. Asakawa, M. Ueki, S. Takahashi, H. Osada, T. Wakimoto, H. Ikeda, K. Shin-Ya, I. Abe,

Characterization of giant modular PKSs provides insight into genetic mechanism for structural diversification of aminopolyol polyketides. *Angew. Chem. Int. Ed. Engl.* **56**, 1740–1745 (2017).

45. E. Krissinel, K. Henrick, Secondary-structure matching (SSM), a new tool for fast protein structure alignment in three dimensions. *Acta Crystallogr. D Biol. Crystallogr.* **60**, 2256–2268 (2004).
46. E. Krissinel, K. Henrick, Inference of macromolecular assemblies from crystalline state. *J. Mol. Biol.* **372**, 774–797 (2007).
47. K. Blin, S. Shaw, K. Steinke, R. Villebro, N. Ziemert, S. Y. Lee, M. H. Medema, T. Weber, antiSMASH 5.0: Updates to the secondary metabolite genome mining pipeline. *Nucleic Acids Res.* **47**, W81–W87 (2019).
48. K. Blin, S. Shaw, S. A. Kautsar, M. H. Medema, T. Weber, The antiSMASH database version 3: Increased taxonomic coverage and new query features for modular enzymes. *Nucleic Acids Res.* **49**, D639–D643 (2021).
49. F. Madeira, M. Pearce, A. R. N. Tivey, P. Basutkar, J. Lee, O. Edbali, N. Madhusoodanan, A. Kolesnikov, R. Lopez, Search and sequence analysis tools services from EMBL-EBI in 2022. *Nucleic Acids Res.* **50**, W276–W279 (2022).
